# Supplementary material for: Characterization of epithelial-mesenchymal transition intermediate/hybrid phenotypes associated to resistance to EGFR inhibitors in non-small cell lung cancer cell lines
Source: PubMed Central journal article supplement (PMC5732732; doi:10.18632/oncotarget.21132), 2017-09-22
Supplement: oncotarget-08-103340-s001.pdf [file oncotarget-08-103340-s001.pdf]

## Characterization of epithelial-mesenchymal transition intermediate/hybrid phenotypes associated to resistance to EGFR inhibitors in non-small cell lung cancer cell lines

### SUPPLEMENTARY MATERIALS

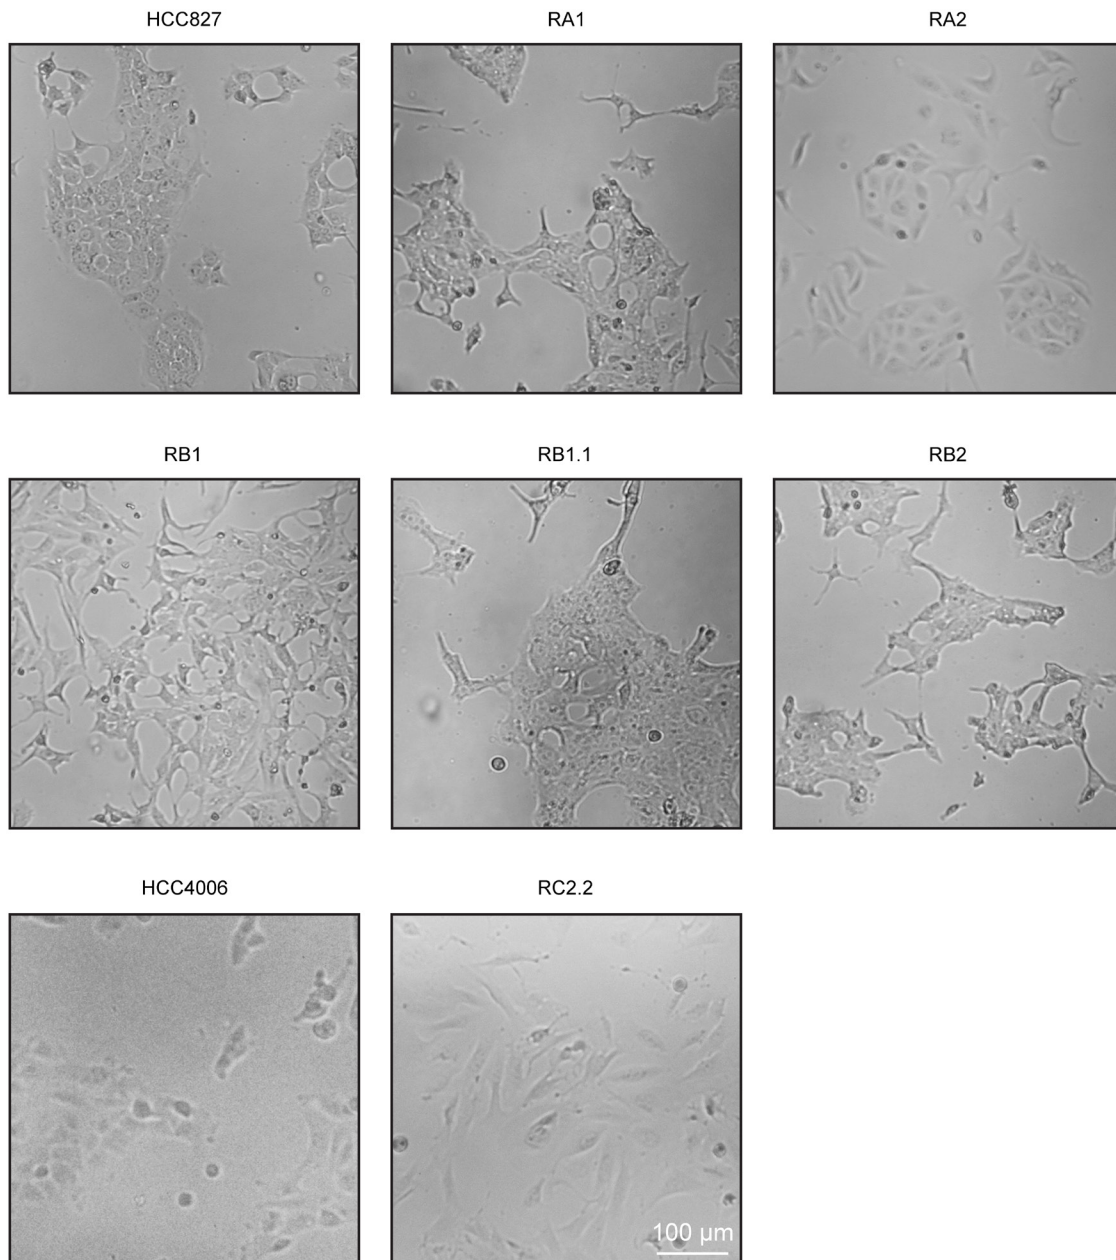

**Supplementary Figure 1: Morphology of NSCLC cell lines.** Erlotinib-sensitive and -resistant cell lines were cultured at low confluence and analyzed with a Leica DM1L microscope with a 4x objective. Scale bar is indicated.

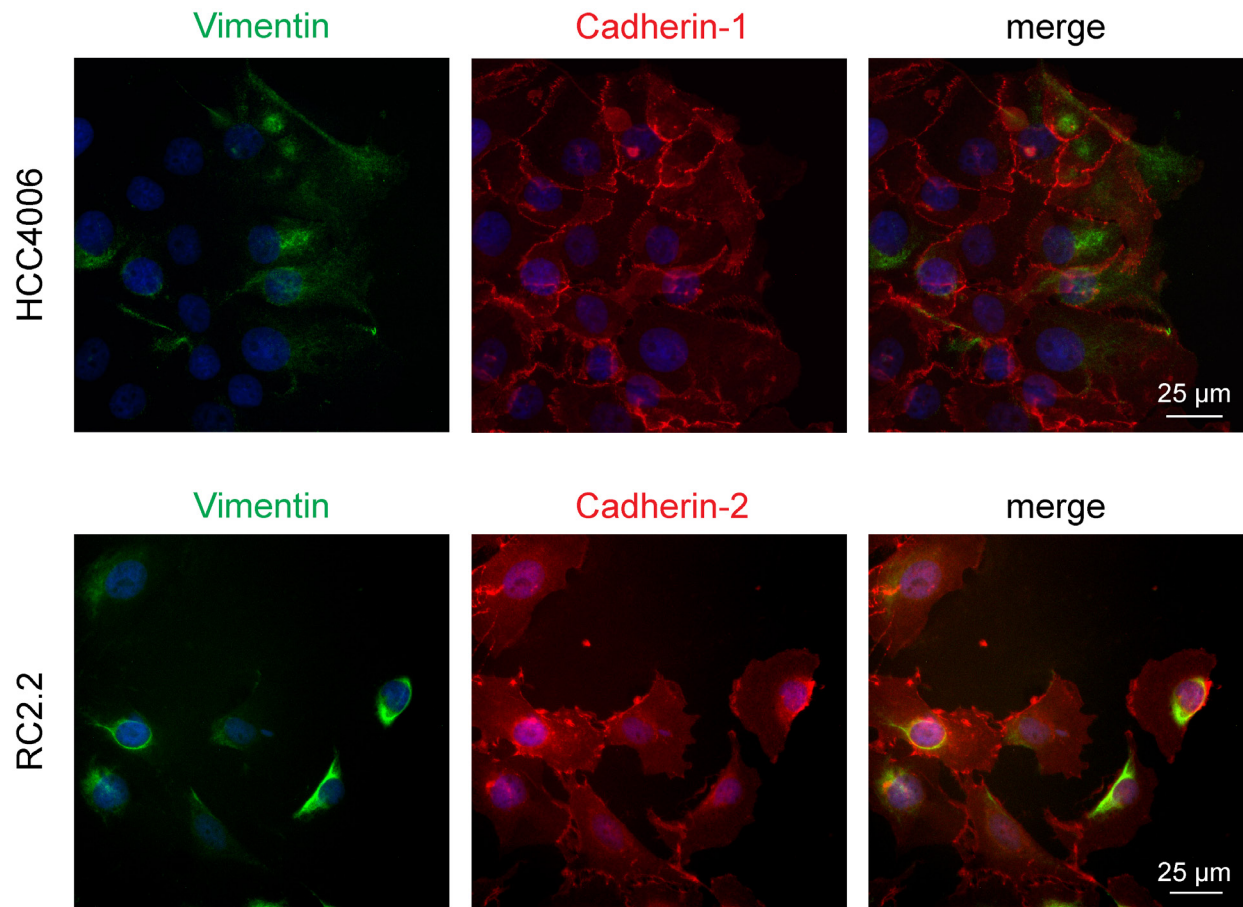

**Supplementary Figure 2: Cell migration of HCC4006 and RC2.2. cell lines at the wound leading edge.** Representative fluorescence microscopy images of wound healing of HCC4006 (erlotinib-sensitive) and RC2.2 (erlotinib-resistant) cell lines stained with specific reactive antibodies for Vimentin (green), Cadherin-1 (HCC4006) or Cadherin-2 (RC2.2) (red) and Hoechst 33258 for nuclei (blue). Scale bars are indicated.

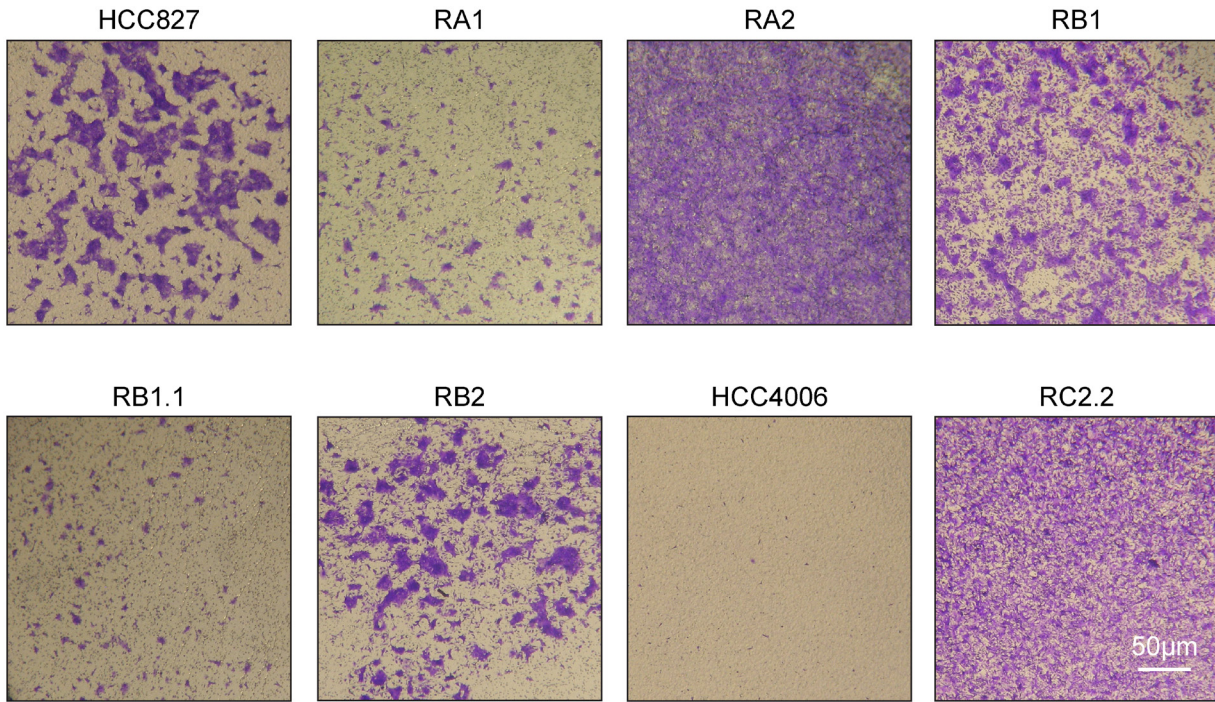

**Supplementary Figure 3: Cell invasion of erlotinib-sensitive and -resistant NSCLC cell lines.** Light microscopy images. Representative fields of erlotinib-sensitive (HCC827 and HCC4006) and -resistant (HCC827-derived RA1, RA2, RB1, RB1.1, RB2 and HCC4006-derived RC2.2) invasive cells on the membrane filter stained with crystal violet are shown. Scale bar is indicated.

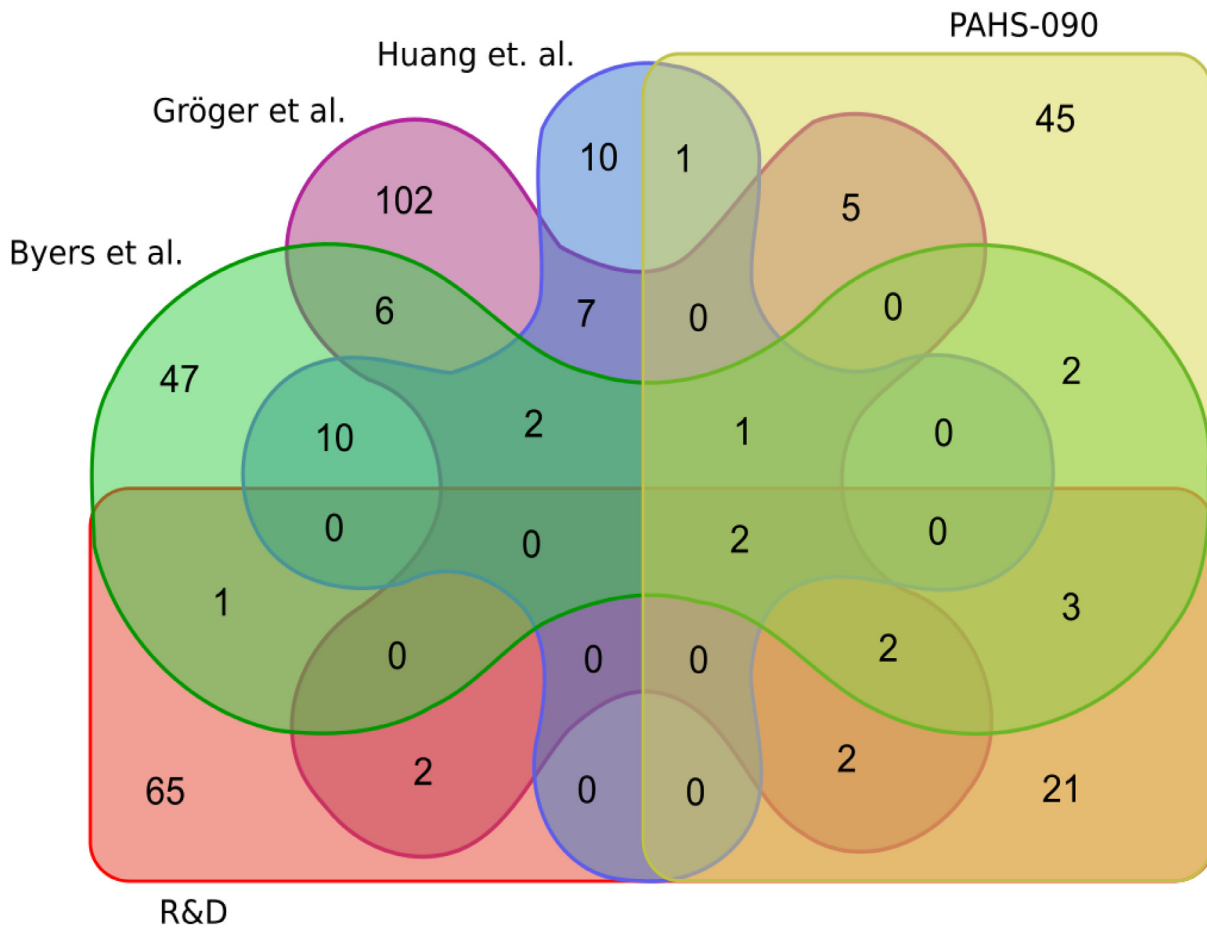

**Supplementary Figure 4: Venn diagram of the five EMT-related gene lists.** The union of all gene lists (as described in Table 4) was 335 genes.

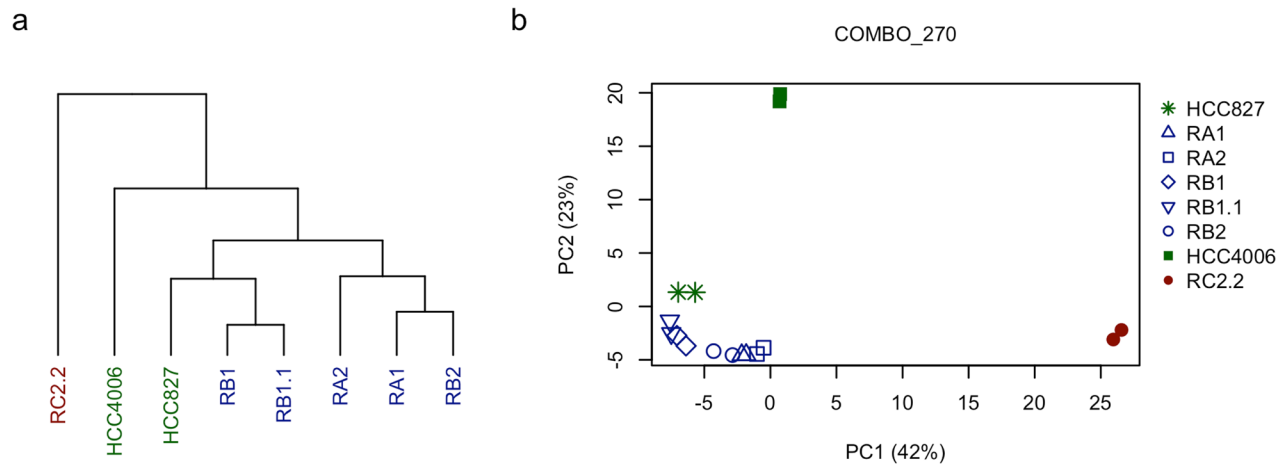

**Supplementary Figure 5: Analysis of the expression of EMT-related genes in erlotinib-resistant NSCLC cell lines.** Hierarchical clustering dendrogram (a) and PC plot (b) of the NSCLC cell lines based on the expression of the COMBO\_270 EMT-related genes. In (b), the percentage of the PC explained variance is shown in brackets. The colors indicate the EMT phenotype features, in green epithelial, in blue epithelial/mesenchymal and in red mesenchymal.

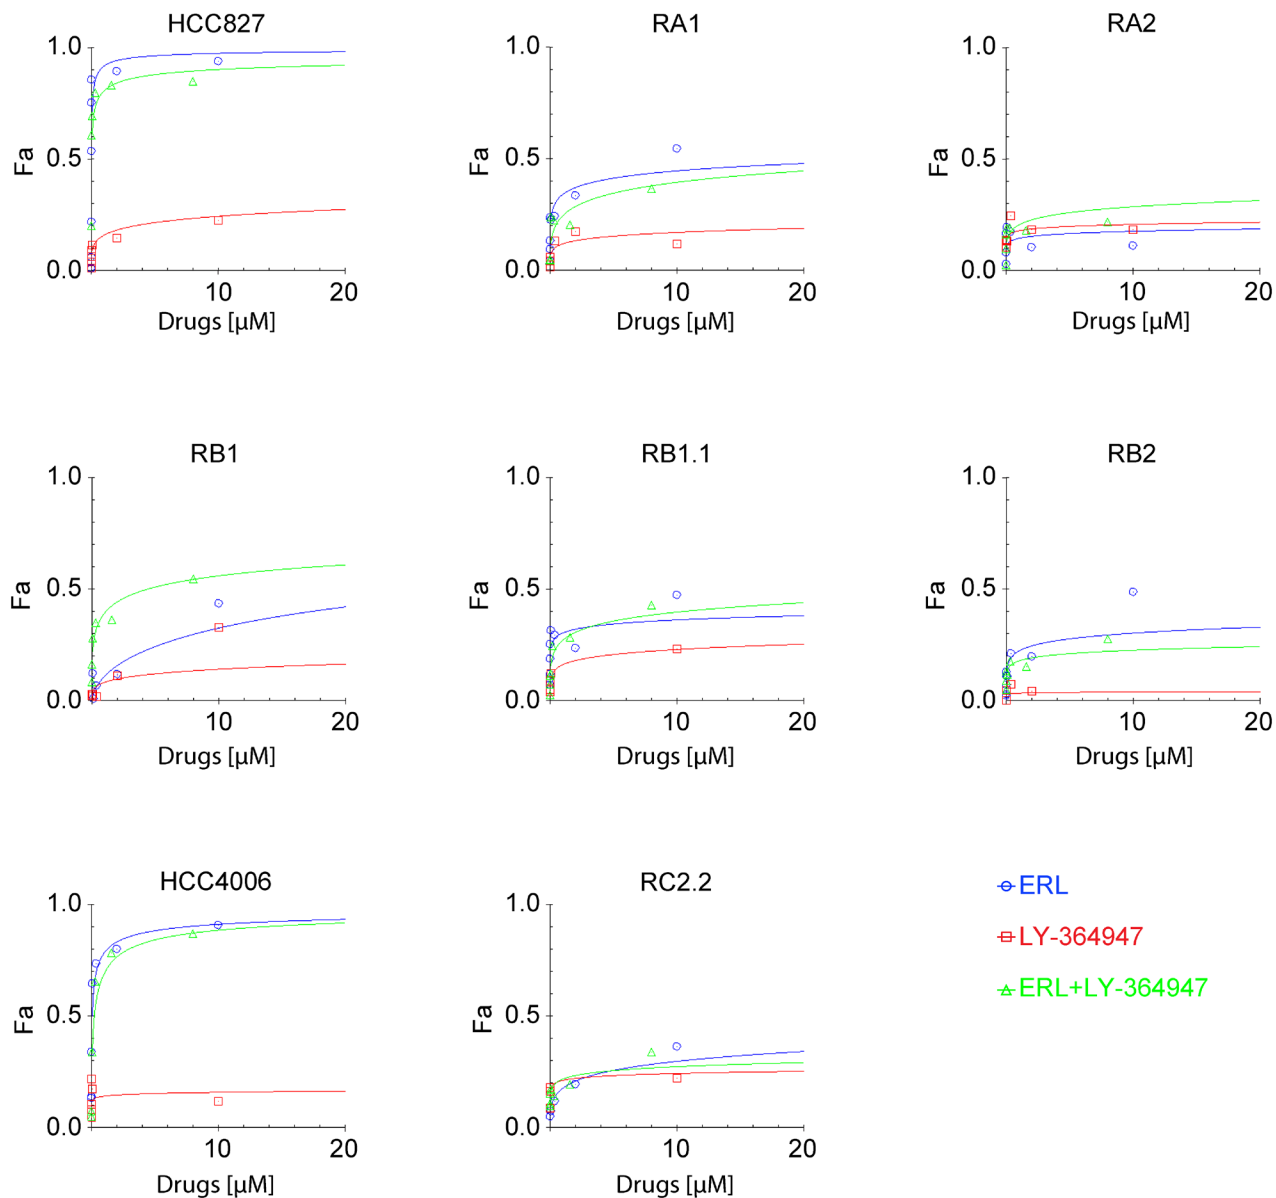

**Supplementary Figure 6: Effects of erlotinib and TGFRβ-1 inhibitors on NSCLC cell lines survival.** Dose-effect curves were calculated according to the Chou-Talalay method as described in material and methods. The curves show the fraction of cells affected by the treatment (Fa) in function of drug concentration. For the double-drug treatments, the combined drug concentrations were used. Each data point represents the mean of 3 replicates.

**Supplementary Table 1: Features of HCC827 and HCC4006 erlotinib-resistant derived cell lines**

|                                                  | HCC827 | RA1 | RA2 | RB1 | RB1.1 | RB2 | HCC4006 | RC2.2 |
|--------------------------------------------------|--------|-----|-----|-----|-------|-----|---------|-------|
| EGFR mutations in Exon 19                        | Y      | Y   | Y   | Y   | Y     | Y   | Y       | Y     |
| EGFR gene amplification                          | Y      | Y   | N   | Y   | Y     | Y   | Y       | Y     |
| EGFR T790M mutation                              | N      | N   | N   | N   | N     | N   | N       | N     |
| Soft Agar growth                                 | Y      | Y   | Y   | Y   | Y     | Y   | Y       | Y     |
| Xenograft growth                                 | Y      | Y   | Y   | Y   | Y     | Y   | Y       | Y     |
| HER2 gene amplification                          | N      | N   | N   | N   | N     | N   | N       | N     |
| HER3 gene amplification                          | N      | N   | N   | N   | N     | N   | N       | N     |
| MET gene amplification                           | N      | Y   | N   | Y   | Y     | Y   | N       | N     |
| AXL upregulation                                 | N      | Y   | Y   | Y   | Y     | Y   | N       | Y     |
| EMT morphology                                   | N      | Y   | Y   | Y   | Y     | Y   | N       | Y     |
| pEGFR downregulation upon ERL treatment          | Y      | Y   | Y   | Y   | Y     | Y   | Y       | Y     |
| pERK1/2 downregulation upon ERL treatment        | Y      | Y   | Y   | Y   | Y     | Y   | Y       | Y     |
| Effect of ERL+ AXL inhibitors on cell survival   | N      | N   | N   | N   | N     | N   | N       | N     |
| Effect of ERL+MET TK inhibitors on cell survival | N      | N   | N   | N   | Y     | N   | N       | N     |

Y = yes and N = no; pEGFR and pERK1/2 indicate respectively phosphorylation in tyrosine 1068 and threonine 202/tyrosine 204; ERL indicates erlotinib, TK tyrosine kinase

**Supplementary Table 2: Expression values (log scale), log fold-changes and annotations of genes differentially expressed in erlotinib-resistant NSCLC cell lines**

See Supplementary File 1

**Supplementary Table 3: Pathway annotations of the INT\_25 gene list**

See Supplementary File 2

**Supplementary Table 4: Expression values (log scale) and log fold-changes of genes coding for stemness markers**

See Supplementary File 3
